# Supplementary material for: Melanoma of Non-Sun Exposed Skin in a Man with Previous Prostate Cancer: Recognition of a Recently Confirmed Association
Source: Springer Nature journal article supplement (doi:10.1007/s13555-014-0045-2), 2014-02-21
Supplement: MOESM1 [file 9271014]

- Patients with prostate cancer have an increased risk to develop melanoma.
- High levels of endogenous androgens may contribute to the association between prostate cancer and risk of melanoma.
- Possible androgen-associated mechanisms of tumorigenesis include host immune response modification, chromosome telomere length alteration, and androgen level imbalance.
- A significant positive association between severe teenage acne (which may represent an early clinical manifestation of androgen imbalance) and melanoma risk has been observed.
- It may be warranted to regularly perform complete skin examination in men who have had prostate cancer - especially in those individuals diagnosed with prostate cancer prior to age 68 years.

This summary slide represents the opinions of the authors. For a full list of acknowledgments and conflicts of interest for all authors of this article, please see the full text online. Copyright © The Authors 2014. Creative Commons Attribution Noncommercial License (CC BY-NC).
